# Supplementary material for: Optimization of parameters during phosphoric acid production using response surface methodology: toward a biomimetic process
Source: Royal Society of Chemistry journal article supplement (doi:10.1039/d4re00150h), 2024-01-01
Supplement: d4re00150h1.pdf [file d4re00150h1.pdf]

# Optimization of parameters during phosphoric acid production using Response Surface Methodology: Toward a Biomimetic Process

Mehdi ABDELOUAHHAB <sup>a\*</sup>, Slimane MANAR <sup>a</sup>, Rachid BENCHIDA <sup>a,b</sup>

<sup>a</sup> Department of Chemical & biochemical Sciences. Green Process Engineering (CBS.GPE), Mohammed VI Polytechnic University, Benguerir, Morocco

<sup>b</sup> Institut de Chimie de Nice, UMR7272, Université Côte d'Azur, Nice, France.

\*Corresponding author: [abdelouahhab.mehdi@um6p.ma](mailto:abdelouahhab.mehdi@um6p.ma)

## -SUPPLEMENTARY DATA-

Table S1 Model coefficients according to the factorial design

|                      | Coefficient | Standard deviation | t.exp. | Signif.%   |
|----------------------|-------------|--------------------|--------|------------|
| <b>b<sub>0</sub></b> | 3.569       | 0.0126             | 134.26 | <0.01***   |
| <b>b<sub>1</sub></b> | -0.175      | 0.0325             | -5.38  | 0.0666***  |
| <b>b<sub>2</sub></b> | -0.225      | 0.0325             | -6.91  | <0.0123*** |
| <b>b<sub>3</sub></b> | -0.627      | 0.0325             | -19.27 | <0.01***   |

Table S2 Analysis of variance according to the factorial design

| Source of variation | Sum of squares | Degrees of freedom | Mean squares | F ratio  | Signif.% |
|---------------------|----------------|--------------------|--------------|----------|----------|
| <b>Regression</b>   | 3.8000         | 3                  | 1.2667       | 149.3694 | <0.01*** |
| <b>Residues</b>     | 0.0678         | 8                  | 0.0085       |          |          |
| <b>Validity</b>     | 0.0196         | 5                  | 0.0039       | 0.2432   | 91.9     |
| <b>Error</b>        | 0.0483         | 3                  | 0.0161       |          |          |
| <b>Total</b>        | 3.8679         | 11                 |              |          |          |

Table S3 Residual table according to the factorial design

|           | Yexp. | Ycalc. | Difference |
|-----------|-------|--------|------------|
| <b>1</b>  | 4.590 | 4.597  | -0.007     |
| <b>2</b>  | 4.220 | 4.231  | -0.027     |
| <b>3</b>  | 4.120 | 4.131  | -0.027     |
| <b>4</b>  | 3.750 | 3.781  | -0.047     |
| <b>5</b>  | 3.310 | 3.326  | -0.032     |
| <b>6</b>  | 2.950 | 2.976  | -0.042     |
| <b>7</b>  | 2.850 | 2.876  | -0.042     |
| <b>8</b>  | 2.550 | 2.526  | 0.008      |
| <b>9</b>  | 3.640 | 3.569  | 0.211      |
| <b>10</b> | 3.670 | 2.569  | 0.101      |
| <b>11</b> | 2.530 | 2.569  | -0.039     |
| <b>12</b> | 3.510 | 3.569  | -0.059     |

**Table S4 Model coefficients according to the Box-Behnken plan**

|             | <b>Coefficient</b> | <b>Standard deviation</b> | <b>t.exp.</b> | <b>Signif.%</b> |
|-------------|--------------------|---------------------------|---------------|-----------------|
| <b>b0</b>   | 3.543              | 0.058                     | 60.98         | <0.01***        |
| <b>b1</b>   | -0.129             | 0.035                     | -3.62         | 1.52*           |
| <b>b2</b>   | -0.203             | 0.035                     | -5.69         | 0.234**         |
| <b>b3</b>   | -0.609             | 0.035                     | -17.11        | <0.01***        |
| <b>B1-1</b> | -0.010             | 0.052                     | -0.20         | 85.0            |
| <b>B2-2</b> | -0.013             | 0.052                     | -0.25         | 81.5            |
| <b>B3-3</b> | 0.015              | 0.052                     | 0.28          | 79.2            |
| <b>B1-2</b> | -0.005             | 0.050                     | -0.10         | 92.5            |
| <b>B1-3</b> | -0.007             | 0.050                     | -0.15         | 88.7            |
| <b>B2-3</b> | 0                  | 0.050                     | 0             | 100             |

\*significant at the 95% level (p<0.1); \*\* significant at the 99% level (p<0.05); \*\*\* significant at the 99.9% level (p<0.01)

**Table S5 Analysis of variance (Box-Behnken plan)**

| <b>Source of variation</b> | <b>Sum of squares</b> | <b>Degrees of freedom</b> | <b>Mean squares</b> | <b>F ratio</b> | <b>Signif.%</b> |
|----------------------------|-----------------------|---------------------------|---------------------|----------------|-----------------|
| <b>Regression</b>          | 3.4275                | 9                         | 0.3808              | 37.6011        | 0.0459***       |
| <b>Residues</b>            | 0.0506                | 5                         | 0.0101              |                |                 |
| <b>Validity</b>            | 0.0472                | 3                         | 0.0157              | 9.0721         | 10.1            |
| <b>Error</b>               | 0.0035                | 2                         | 0.0017              |                |                 |
| <b>Total</b>               | 3.4782                | 14                        |                     |                |                 |

**Table S6 Residual table according to the Box-Behnken plan**

|           | <b>Yexp.</b> | <b>Ycalc.</b> | <b>Difference</b> |
|-----------|--------------|---------------|-------------------|
| <b>1</b>  | 3.740        | 3.846         | -0.106            |
| <b>2</b>  | 3.580        | 3.599         | -0.019            |
| <b>3</b>  | 3.470        | 3.451         | 0.019             |
| <b>4</b>  | 3.290        | 3.184         | 0.106             |
| <b>5</b>  | 4.330        | 4.277         | 0.053             |
| <b>6</b>  | 4.000        | 4.035         | -0.035            |
| <b>7</b>  | 3.110        | 3.075         | 0.035             |
| <b>8</b>  | 2.750        | 2.802         | -0.052            |
| <b>9</b>  | 4.410        | 4.356         | 0.054             |
| <b>10</b> | 3.880        | 3.951         | -0.071            |
| <b>11</b> | 3.210        | 3.139         | -0.071            |
| <b>12</b> | 2.68         | 2.734         | -0.054            |
| <b>13</b> | 3.590        | 3.543         | 0.047             |
| <b>14</b> | 3.530        | 3.543         | -0.013            |
| <b>15</b> | 3.510        | 3.543         | -0.033            |

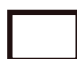

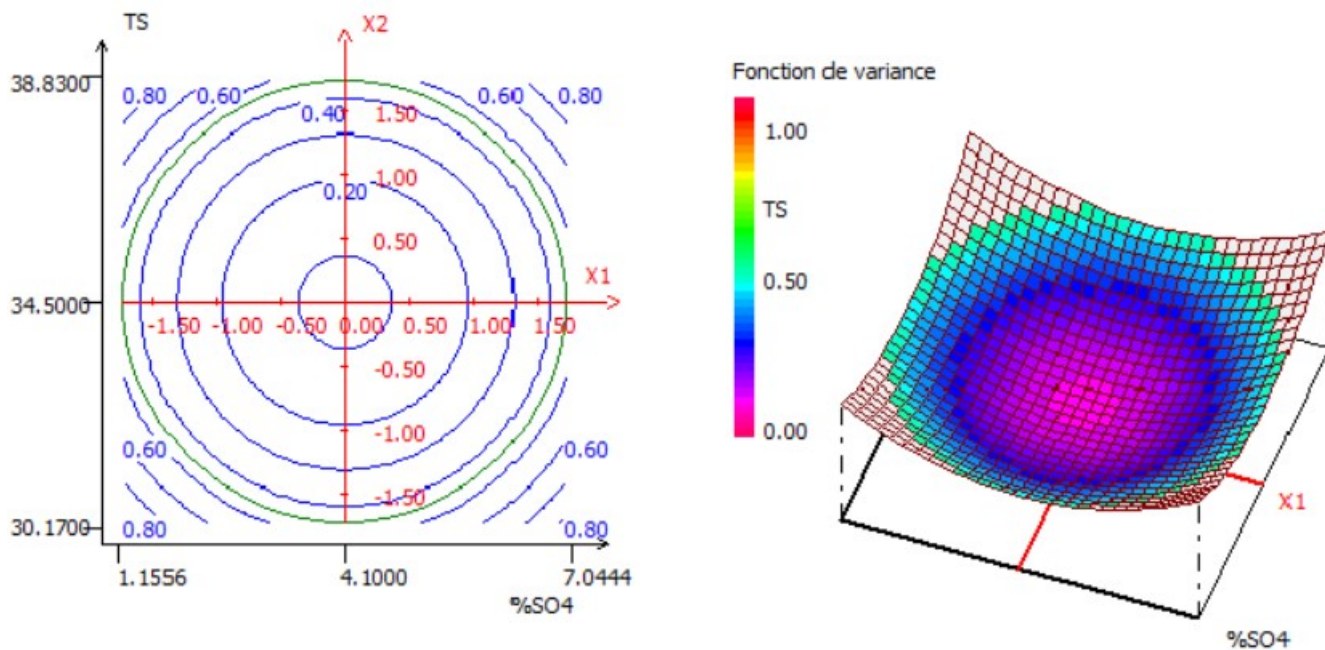

**Figure S1** Variation of the variance function - in the plane: %SO<sub>4</sub>, TS  
 - %P<sub>2</sub>O<sub>5</sub> = 30 % (fixed factor)

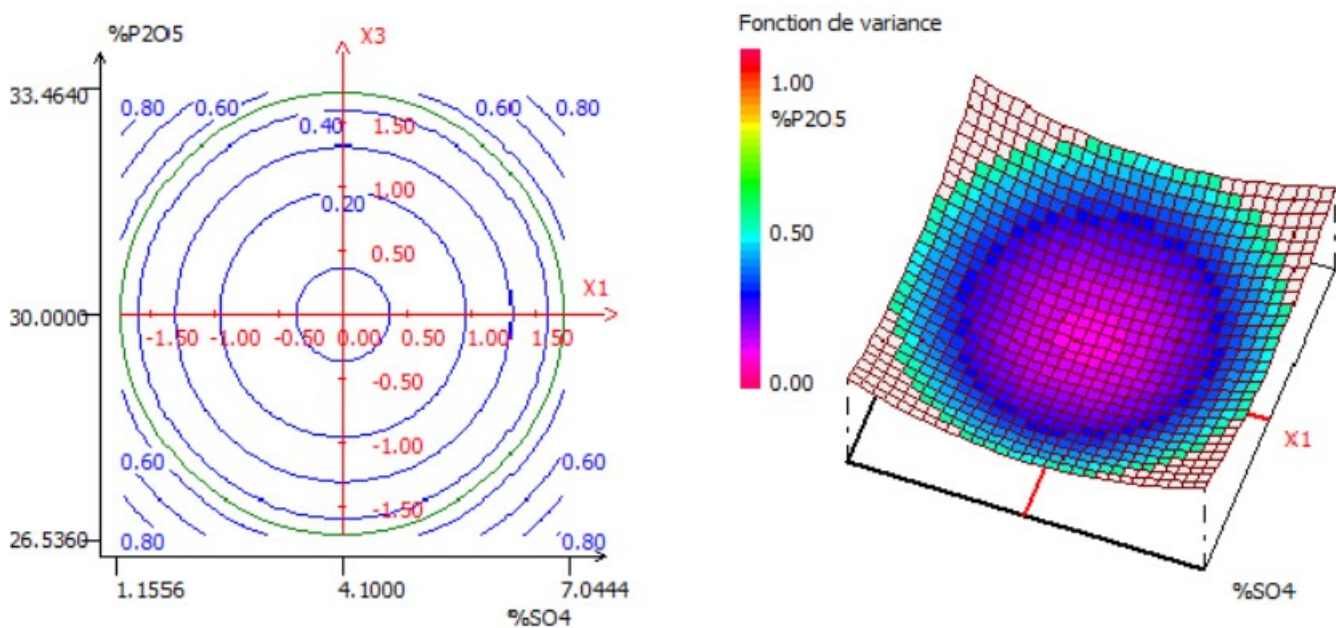

**Figure S2** Variation of the variance function - in the plane: %SO<sub>4</sub>, %P<sub>2</sub>O<sub>5</sub>  
 - TS = 34.5% (fixed factor)

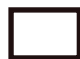

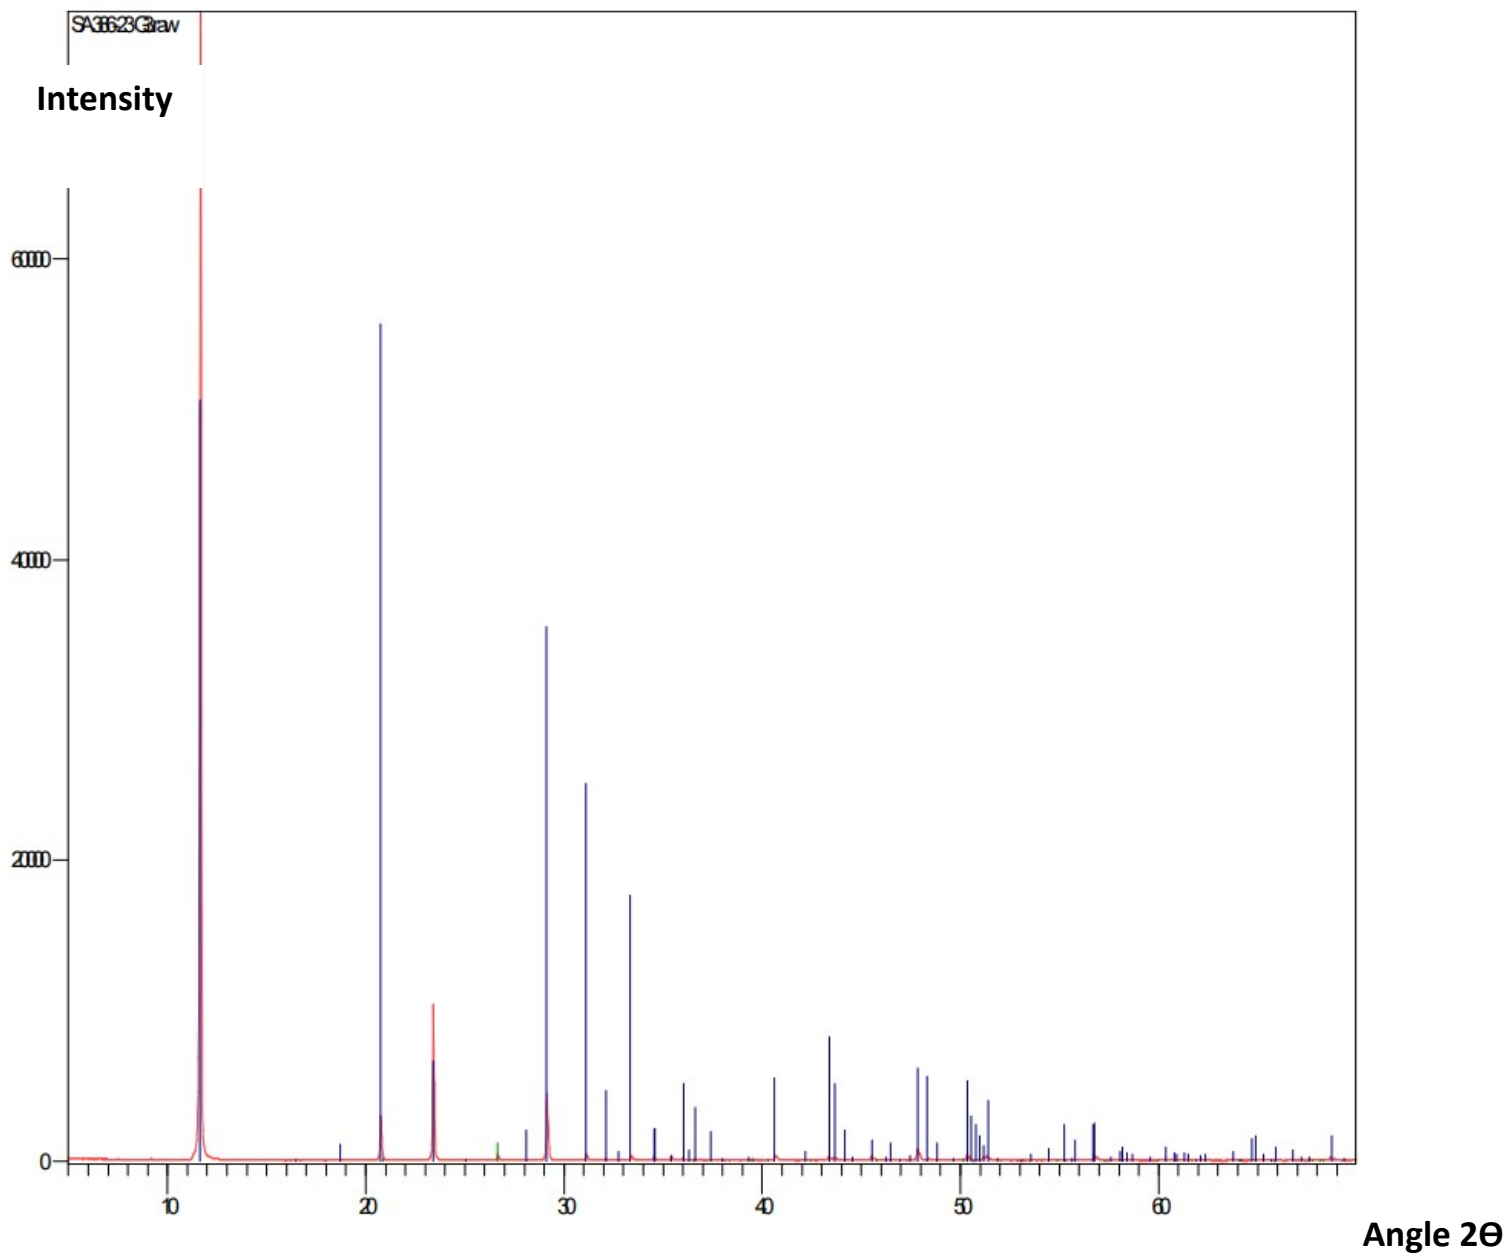

| Visible | Ref. Code | Compound Name | Chemical Formula                               |
|---------|-----------|---------------|------------------------------------------------|
| ++++    | 70-0984   | Gypsum        | $\text{Ca}(\text{SO}_4)(\text{H}_2\text{O})_2$ |
| ++++    | 46-1045   | Quartz, syn   | $\text{SiO}_2$                                 |

Figure S3 XRD Pattern for the phosphogypsum LF

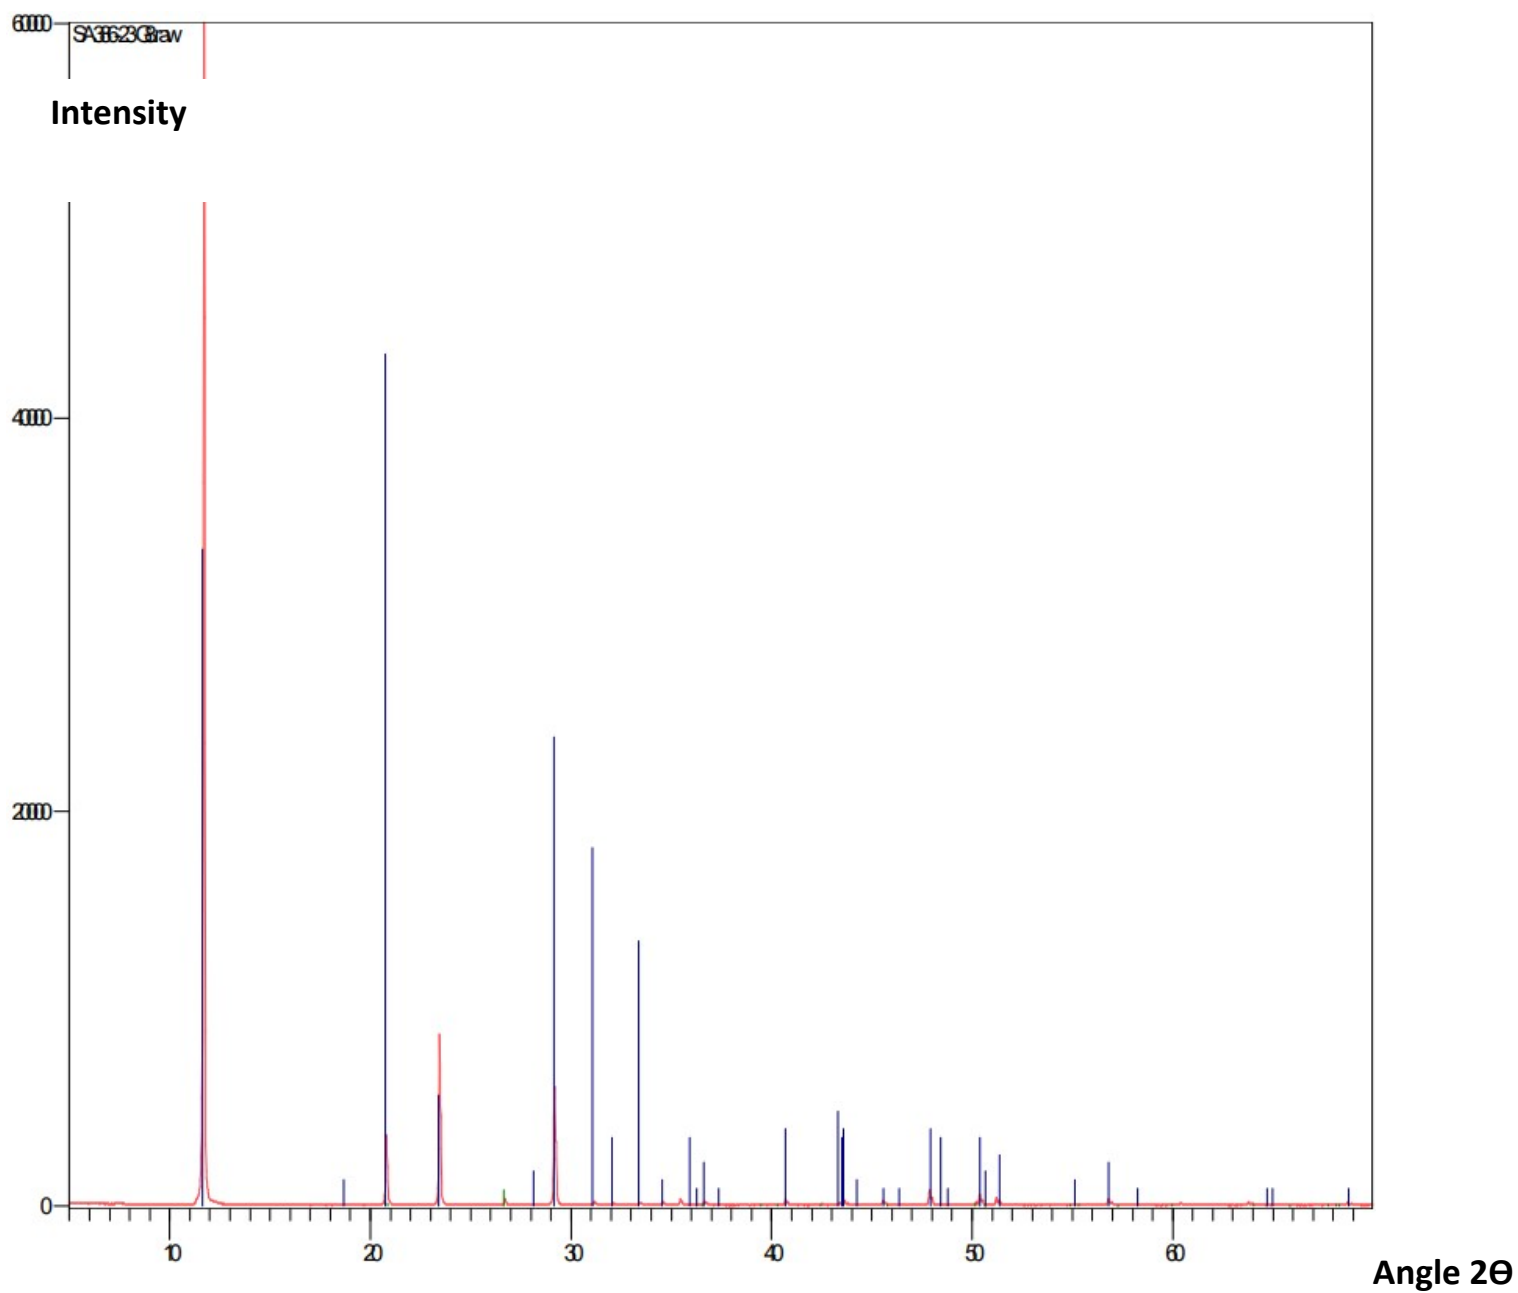

| Visible | Ref. Code | Compound Name | Chemical Formula |
|---------|-----------|---------------|------------------|
| ++++    | 36-0432   | Gypsum        | Ca S O4 !2 H2 O  |
| ++++    | 46-1045   | Quartz, syn   | Si O2            |

Figure S4 XRD Pattern for the phosphogypsum HF
